# Supplementary material for: Low iron-induced small RNA BrrF regulates central metabolism and oxidative stress responses in Burkholderia cenocepacia
Source: PubMed Central journal article supplement (PMC7377471; doi:10.1371/journal.pone.0236405), 2020-07-23
Supplement: pone.0236405.s005.pdf [file pone.0236405.s005.pdf]

**Table S1:** Strains and plasmids used in this study.

| <b>Strains</b>              |                                                                                                                                                               |                |
|-----------------------------|---------------------------------------------------------------------------------------------------------------------------------------------------------------|----------------|
| <i>B. cenocepacia</i> J2315 | Wild type (Wt), ET-12 lineage, CF isolate, LMG 16656                                                                                                          | Lab collection |
| $\Delta brrF$               | J2315 <i>brrF</i> deletion mutant                                                                                                                             | This study     |
| Wt-VC                       | J2315 + pSCrhaM2                                                                                                                                              | [8]            |
| Wt-pBrrF-d1                 | J2315 + pM2- <i>brrF</i> -d1                                                                                                                                  | This study     |
| Wt-pBrrF-d2                 | J2315 + pM2- <i>brrF</i> -d2                                                                                                                                  | This study     |
| Wt-pBrrF-d3                 | J2315 + pM2- <i>brrF</i> -d3                                                                                                                                  | This study     |
| $\Delta brrF$ -VC           | $\Delta brrF$ + pSCrhaM2                                                                                                                                      | This study     |
| $\Delta brrF$ -pBrrF-d1     | $\Delta brrF$ + pBrrF-d1                                                                                                                                      | This study     |
| $\Delta brrF$ -pBrrF-d2     | $\Delta brrF$ + pBrrF-d2                                                                                                                                      | This study     |
| $\Delta brrF$ -pBrrF-d3     | $\Delta brrF$ + pBrrF-d3                                                                                                                                      | This study     |
| <b>Plasmids</b>             |                                                                                                                                                               |                |
| pSCrhaM2                    | Derivative of pSCrhaB2, RBS and start codons removed, <i>ori<sub>pBBR1</sub></i> , <i>rhaR</i> and <i>RhaS-P<sub>rhaB</sub></i> , T <sub>p</sub> <sup>r</sup> | [8]            |
| pBrrF-d1                    | pSCrhaM2 overexpressing sRNA BrrF from 80 nt upstream of the putative processing site to 49 nt downstream of the computationally predicted terminator         | This study     |
| pBrrF-d2                    | Derivative of pBrrF-d1, overexpressing BrrF from the putative processing site to 49 nt downstream of the computationally predicted terminator                 | This study     |
| pBrrF-d3                    | Derivative of pBrrF-d1, with point mutations at position 8 and 9, replacing guanosine residues with cytosine residues                                         | This study     |
