# Supplementary material for: Low iron-induced small RNA BrrF regulates central metabolism and oxidative stress responses in Burkholderia cenocepacia
Source: PubMed Central journal article supplement (PMC7377471; doi:10.1371/journal.pone.0236405), 2020-07-23
Supplement: pone.0236405.s006.pdf [file pone.0236405.s006.pdf]

**Table S2:** Primers used in this study.

| Primers                                                                             | Oligonucleotide sequence, 5'–3'             |                                                            |
|-------------------------------------------------------------------------------------|---------------------------------------------|------------------------------------------------------------|
| <b>Insert for BrrF overexpression mutant OV1</b>                                    |                                             |                                                            |
| S63ov-F-SpeI                                                                        | AA <u>AACTAGTC</u> CAGCATCGCGCATAACGGAGAGAC |                                                            |
| S63ov-R-Hind                                                                        | TTT <u>AAGCTT</u> ACATACACGCGGGCCGCATG      |                                                            |
| <b>Shorter insert, from cleavage site of <i>brrF</i>, by inverse PCR (pBrrF-d2)</b> |                                             |                                                            |
| pSC-TSS-BrrF-d2-F                                                                   | GTATTGTGGGGACCACCTCCCTG                     |                                                            |
| pSC-TSS-R2                                                                          | ATTACGACCAGTCTAAAAAGCGCCTG                  |                                                            |
| <b>Point mutation of <i>brrF</i>, by inverse PCR (pBrrF-d3)</b>                     |                                             |                                                            |
| pSC-TSS-BrrF-d3-F                                                                   | GTATTGTGCCGACCACCTCCCTGAGAG                 |                                                            |
| pSC-TSS-R2                                                                          | ATTACGACCAGTCTAAAAAGCGCCTG                  |                                                            |
| <b>Amplification of plasmid inserts for Sanger sequencing</b>                       |                                             |                                                            |
| rha1F                                                                               | CACGTTTCATCTTTCCCTGGT                       |                                                            |
| rha1R                                                                               | CTCTCATCCGCCAAAACAGC                        |                                                            |
| <b>Constructing and confirming deletion mutant <math>\Delta brrF</math></b>         |                                             |                                                            |
| preS63F-Nhe                                                                         | AAAGCTAGCGACGCGCACACCGATCCTCTAC             | amplification of upstream flanking region                  |
| preS63R-Bgl                                                                         | AAAAGATCTGGAGGTGGTCCCCACAATACTCG            |                                                            |
| postS63F-Bgl                                                                        | TTTAGATCTCCAAGCCACTTTTTTGGTTCTCG            | amplification of upstream flanking region                  |
| postS63R-Sma                                                                        | AAACCCGGGGCGTGTGGTGCAAGTACCTGTG             |                                                            |
| joinS63F                                                                            | TCAAACCGAATGACCGACAC                        | amplification across <i>brrF</i> locus to confirm deletion |
| joinS63R                                                                            | GGGATTCTGAAGCGACTTGC                        |                                                            |
| <b>qPCR primers</b>                                                                 |                                             |                                                            |
| M0918F                                                                              | GAGATGAGCACCGATCACAC                        | RNA polymerase <i>rpoD</i> , control gene                  |
| M0918R                                                                              | CCTTCGAGGAACGACTTCAG                        |                                                            |
| S63F                                                                                | AGAGGTGTTGGGCAGTAGCC                        | <i>brrF</i> , anneals at nt 24 - 43                        |
| S63R                                                                                | GGCTGCTTGAGTGTGTTTC                         | <i>brrF</i> , anneals at nt 82 - 101                       |
| M0967F                                                                              | TCGTCAAGCTGATCGTCCTC                        | <i>sdhC</i>                                                |
| M0967R                                                                              | CGATCGAGACGACAAAGACG                        |                                                            |

|        |                       |             |
|--------|-----------------------|-------------|
| M0969F | CAACGGTTTCTACGCAGTGG  | <i>sdhA</i> |
| M0969R | TGGTTCTTCACGTGCTCGAC  |             |
| M0961F | CGTTCGACACGTTCAAGGTC  | <i>acnA</i> |
| M0961R | ATCATCGTCGTGTGGCTGTC  |             |
| M2701F | ACAACATCACGACCGACCAC  | <i>acnM</i> |
| M2701R | TCGCGTACGAATTGAAGTCC  |             |
| L3299F | AATCGATGGGCTTCAAGACG  | <i>katB</i> |
| L3299R | GACCTTCCGGGTTACAGTAG  |             |
| M0931F | CGAAGTGGGACCTGTACGTG  | catalase    |
| M0931R | CAGACCTTCGTGTCGTCGAG  |             |
| L2757F | ACATCGTGTGCGACGAGCAAC | <i>sodB</i> |
| L2757R | CGAAGTCCCAGTTCACGATG  |             |
| L2143F | GGCTGCATCACTTCTTCACG  | <i>cyoB</i> |
| L2143R | GCCAGTTGAACACCTTCACG  |             |
| L2343F | AGTCGGACGTGATGATCGTG  | <i>nuoB</i> |
| L2343R | CGGACCACCGAGTACGAGTAG |             |
| L2908F | GATCGACCTGTTGCTGAACG  | <i>fumC</i> |
| L2908R | TCAGTGTGCTGCCTTCCTTG  |             |
| L2287F | GCTACTACCACCCGCTCGAC  | <i>fumA</i> |
| L2287R | CGTTGATCATGTCCGGTGAGG |             |
| L3367F | CATCCTGATCGACTGGAACG  | <i>edd</i>  |
| L3367R | GCTTCGGCTCCTTCGTGTAG  |             |
| L2643F | CGGCTGTACCTCCTTTTCCTC | <i>sodC</i> |
| L2643R | CAGGCCGACCAGGTTGTAG   |             |
| M1833F | GAAGTGTTTCATCGGCTCGTG | <i>acnB</i> |
| M1833R | CACAGCTTGACCGGAATGTC  |             |
| M2107F | TCTCGCGTCATTTTCATGGAC | <i>katA</i> |
| M2107R | GGATCCTGCCAGATCAGCTC  |             |
| M0965F | CGCTTACTCCCTGCTGTTCC  | <i>mdh</i>  |
| M0965R | AATGCAACCTTCGGATCGTC  |             |
| L2735F | CAAGAACTACGCACGCAAGC  | <i>idh</i>  |
| L2735R | GATGCGTCGATCACTTCACC  |             |
| M0972F | GCTACCCGATCGACAACCTC  | <i>gltA</i> |
| M0972R | ACCATCGTGTGCTTCGTGAC  |             |
