# Supplementary material for: Low iron-induced small RNA BrrF regulates central metabolism and oxidative stress responses in Burkholderia cenocepacia
Source: PubMed Central journal article supplement (PMC7377471; doi:10.1371/journal.pone.0236405), 2020-07-23
Supplement: pone.0236405.s008.pdf [file pone.0236405.s008.pdf]

**Table S4:** All log2-fold changes in gene expression determined by qPCR.

|                   |           | BrrF overexpression in iron-replete condition |                                             | Iron depletion                       |                      | BrrF overexpression under iron depletion    |                                             |                                             |
|-------------------|-----------|-----------------------------------------------|---------------------------------------------|--------------------------------------|----------------------|---------------------------------------------|---------------------------------------------|---------------------------------------------|
| Background strain |           | WT                                            | $\Delta brrF$                               | WT                                   | $\Delta brrF$        | $\Delta brrF$                               | $\Delta brrF$                               | $\Delta brrF$                               |
| Gene              | Locus tag | WT-pBrrF-d1 / WT-VC                           | $\Delta brrF$ -pBrrF-d1 / $\Delta brrF$ -VC | 200 $\mu$ M dipyridyl / no dipyridyl |                      | $\Delta brrF$ -pBrrF-d1 / $\Delta brrF$ -VC | $\Delta brrF$ -pBrrF-d2 / $\Delta brrF$ -VC | $\Delta brrF$ -pBrrF-d3 / $\Delta brrF$ -VC |
| <i>sdhC</i>       | BCAM0967  | -0.36 (0.093)                                 | -0.40 (0.059)                               | <b>-1.28</b> (0)                     | -0.29 (0.241)        | <b>-1.41</b> (0.023)                        | <b>-1.62</b> (0.011)                        | <b>-1.34</b> (0.03)                         |
| <i>sdhA</i>       | BCAM0969  | -0.13 (0.597)                                 | -0.10 (0.766)                               | <b>-2.25</b> (0)                     | 0.24 (0.479)         | <b>-2.28</b> (0.008)                        | <b>-2.48</b> (0.005)                        | <b>-2.24</b> (0.009)                        |
| <i>acnA</i>       | BCAM0961  | <b>-0.76</b> (0.028)                          | -0.30 (0.522)                               | <b>-4.22</b> (0)                     | -0.52 (0.401)        | <b>-3.53</b> (0)                            | <b>-3.19</b> (0)                            | -0.47 (0.178)                               |
| <i>acnM</i>       | BCAM2701  | -0.46 (0.189)                                 | -0.17 (0.829)                               | <b>-2.00</b> (0)                     | 0.42 (0.568)         | 1.05 (0.812)                                | 2.22 (0.309)                                | 2.28 (0.289)                                |
| <i>fumC</i>       | BCAL2908  | <b>1.13</b> (0.003)                           | <b>1.00</b> (0.007)                         | <b>1.76</b> (0)                      | <b>0.42</b> (0.006)  | <b>1.61</b> (0.036)                         | 0.96 (0.248)                                | -0.69 (0.498)                               |
| <i>fumA</i>       | BCAL2287  | <b>-1.39</b> (0.020)                          | -0.69 (0.301)                               | <b>-5.38</b> (0)                     | <b>-1.09</b> (0)     | <b>-5.11</b> (0)                            | <b>-3.59</b> (0)                            | -0.76 (0.08)                                |
| <i>sodB</i>       | BCAL2757  | <b>-1.22</b> (0.010)                          | -0.64 (0.174)                               | <b>-2.34</b> (0)                     | <b>0.75</b> (0.001)  | <b>-4.31</b> (0)                            | <b>-3.49</b> (0)                            | <b>-1.32</b> (0.006)                        |
| <i>katB</i>       | BCAL3299  | -0.23 (0.864)                                 | 0.01 (1.0)                                  | <b>-1.72</b> (0)                     | <b>0.98</b> (0.001)  | <b>-2.01</b> (0.039)                        | -1.88 (0.053)                               | -0.54 (0.803)                               |
| catalase          | BCAM0931  | -0.25 (0.519)                                 | 0.04 (0.995)                                | <b>-0.83</b> (0)                     | <b>-0.18</b> (0.032) | -0.93 (0.072)                               | -0.82 (0.120)                               | -0.33 (0.73)                                |
| <i>nuoB</i>       | BCAL2343  | 0.11 (0.875)                                  | -0.07 (0.968)                               | <b>-1.20</b> (0)                     | -0.07 (0.951)        | -0.58 (0.364)                               | -0.68 (0.252)                               | -0.58 (0.369)                               |
| <i>edd</i>        | BCAL3367  | -0.32 (0.740)                                 | 0.23 (0.885)                                | <b>-3.60</b> (0)                     | <b>-1.54</b> (0.001) | <b>-2.06</b> (0.001)                        | <b>-1.92</b> (0.002)                        | <b>-1.67</b> (0.005)                        |
| <i>cyoB</i>       | BCAL2143  | 0.03 (0.602)                                  | n.d.                                        | -0.52 (0.372)                        | -0.19 (0.916)        | n.d.                                        | n.d.                                        | n.d.                                        |
| <i>sodC</i>       | BCAL2643  | 0.04 (0.586)                                  | n.d.                                        | 0.21 (0.300)                         | <b>0.74</b> (0.001)  | n.d.                                        | n.d.                                        | n.d.                                        |
| <i>icd</i>        | BCAL2735  | 0.04 (0.682)                                  | n.d.                                        | -0.42 (0.078)                        | -0.00 (1.000)        | n.d.                                        | n.d.                                        | n.d.                                        |
| <i>mdh</i>        | BCAM0965  | 0.02 (0.837)                                  | n.d.                                        | -0.15 (0.489)                        | <b>-0.41</b> (0.017) | n.d.                                        | n.d.                                        | n.d.                                        |
| <i>gltA</i>       | BCAM0971  | -0.12 (0.198)                                 | n.d.                                        | <b>-0.75</b> (0)                     | -0.25 (0.134)        | n.d.                                        | n.d.                                        | n.d.                                        |
| <i>acnB</i>       | BCAM1833  | -0.17 (0.218)                                 | n.d.                                        | 0.03 (0.993)                         | <b>0.44</b> (0.026)  | n.d.                                        | n.d.                                        | n.d.                                        |
| <i>katA</i>       | BCAM2107  | -0.02 (0.637)                                 | n.d.                                        | -0.57 (0.156)                        | 0.15 (0.921)         | n.d.                                        | n.d.                                        | n.d.                                        |

In brackets: p-values after Tukey's post-hoc test of ANOVA, 0 denotes p-value < 0.001, fold changes with  $p \leq 0.05$  are in bold, n.d. not determined.
